# Supplementary material for: Construction and Characterization of an F1DH Population and High-Density Genetic Map for Ornamental Kale Breeding
Source: Preprints.org preprint supplement (doi:10.20944/preprints202310.0558.v1), 2023-10-11
Supplement: Supplementary file 1 [file supplementary]

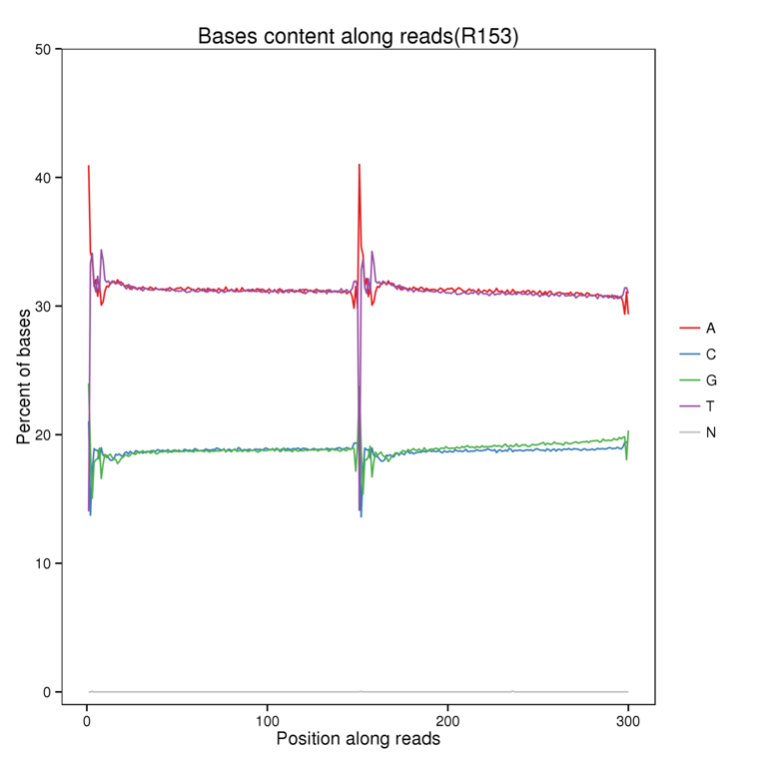


**Supplementary Fig. S1** Base ratio distribution for the female parental line 05-DH-65.

**Supplementary Table S1** Coverage depth and coverage ratio of the sequencing data

| Sample | Average depth | Average coverage ratio 1X (%) | Average coverage ratio 5X (%) | Average coverage ratio 10X(%) |
| --- | --- | --- | --- | --- |
| 05-DH-65 | 64.00 | 93.73 | 91.50 | 89.97 |
| 06-DH-71 | 34.00 | 93.37 | 90.32 | 87.97 |
| F1DH offspring | 2.60 | 72.55 | 16.24 | 3.01 |


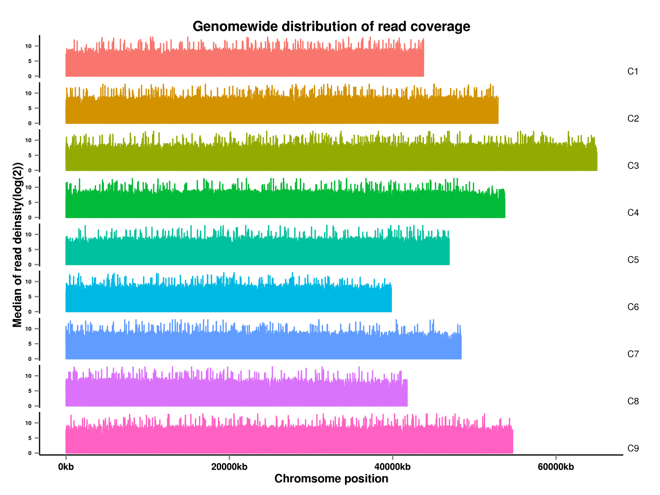


**Supplementary Fig. S2** Coverage depth distribution on chromosomes of the female parental line. The *x*-axis represents the position on each chromosome. The *y*-axis presents the log2 value of the coverage depth.
